# Supplementary material
Source: HighWire-hosted journal article supplement (https://bmjopen.bmj.com/content/7/6/e015021)
Supplement: inline-supplementary-material-1 [file inline-supplementary-material-1.docx]

Supplementary Table 1. IR, IRR, and IRD comparing 2 versus 3 dose vaccination by age at vaccination initiation and time between dose 1 and 2, adjusted for attained age and education level.

| **Age at first vaccination** | **Number of doses** | **Time between dose 1 and 2 (months)** | **IR, 95%CI*** | **P-value** | **IRR, 95%CI** | **P-value** | **IRD, 95%CI*** | **P-value** |
| --- | --- | --- | --- | --- | --- | --- | --- | --- |
| ≤16yr | 3 doses | Standard dosing schedule (0, 2, 6) | 61 (52;70) | <0.001 | Ref | Ref | Ref | Ref |
|  | 2 doses | 0-3 | 119 (88;151) | <0.001 | 1.96 (1.43;2.70) | <0.001 | 60 (25;95) | 0.001 |
|  |  | 4-7 | 77 (24;131) | 0.005 | 1.17 (0.55;2.51) | 0.669 | 11 (-44;66) | 0.692 |
|  |  | 8+ | 265 (68;462) | 0.008 | 4.02 (1.78;9.07) | 0.001 | 188 (-13;388) | 0.067 |
|  |  |  |  |  |  |  |  |  |
| 17-19yr | 3 doses | Standard dosing schedule (0, 2, 6) | 113 (90;135) | <0.001 | Ref | Ref | Ref | Ref |
|  | 2 doses | 0-3 | 239 (187;291) | <0.001 | 2.15 (1.63;2.84) | <0.001 | 131 (75;186) | <0.001 |
|  |  | 4-7 | 91 (18;165) | 0.015 | 0.88 (0.39;2.00) | 0.767 | -13 (-95;69) | 0.754 |
|  |  | 8+ | 355 (68;643) | 0.015 | 3.39 (1.50;7.68) | 0.003 | 270 (-39;579) | 0.087 |

*IR, IRD reported per 100 000 person-years. Reference groups: ≤16yr with 3 doses of qHPV (0,2,6 months) and 17-19yr with 3 doses of qHPV (0,2,6 months)
